# Supplementary material
Source: Royal Society of Chemistry journal article supplement (doi:10.1039/d6nj00633g)
Supplement: d6nj00633g1.pdf [file d6nj00633g1.pdf]

## Supporting Information

# Visible light degradation of tetracycline and bisphenol A by a hybrid photocatalyst composed of orange peel biochar, clay, and C/N-doped titania

Morenike O. Adesina<sup>a,b,c,d\*</sup>, Moses O. Alfred<sup>a,b,c</sup>, Harshadrai M. Rawel<sup>c</sup>, Christina Günter<sup>f</sup>, Anne Nitschke<sup>a</sup>, Jiyong Kim<sup>g</sup>, Armin Wedel<sup>g</sup>, Wouter Koopman<sup>h</sup>, Martins O. Omorogie<sup>a,b,c</sup>, Emmanuel I. Unuabonah<sup>b,c\*</sup>, and Andreas Taubert<sup>a,\*</sup>

*<sup>a</sup>Institute of Chemistry, University of Potsdam, D-14476 Potsdam, Germany*

*<sup>b</sup>African Centre of Excellence for Water and Environmental Research (ACEWATER), Redeemer's University, PMB 230, 232101 Ede, Nigeria*

*<sup>c</sup>Department of Chemical Sciences, Redeemer's University, PMB 230, 232101 Ede, Nigeria.*

*<sup>d</sup>Department of Chemical Sciences, Lead City University, 200005 Ibadan, Nigeria*

*<sup>e</sup> Institute of Nutritional Science, University of Potsdam, D-14558 Nuthetal Potsdam, Germany*

*<sup>f</sup>Institute of Geosciences, University of Potsdam, D-14476 Potsdam, Germany*

*<sup>g</sup>Functional Materials and Devices, Fraunhofer Institute for Applied Polymer Research IAP, Potsdam, D-14476 Potsdam, Germany*

*<sup>h</sup>Institute of Physics and Astronomy, University of Potsdam, D-14476 Potsdam, Germany*

\* Email: [adesina9856@run.edu.ng](mailto:adesina9856@run.edu.ng)

\* Email: [ataubert@uni-potsdam.de](mailto:ataubert@uni-potsdam.de)

\* E.I.U. Deceased on March 26, 2025

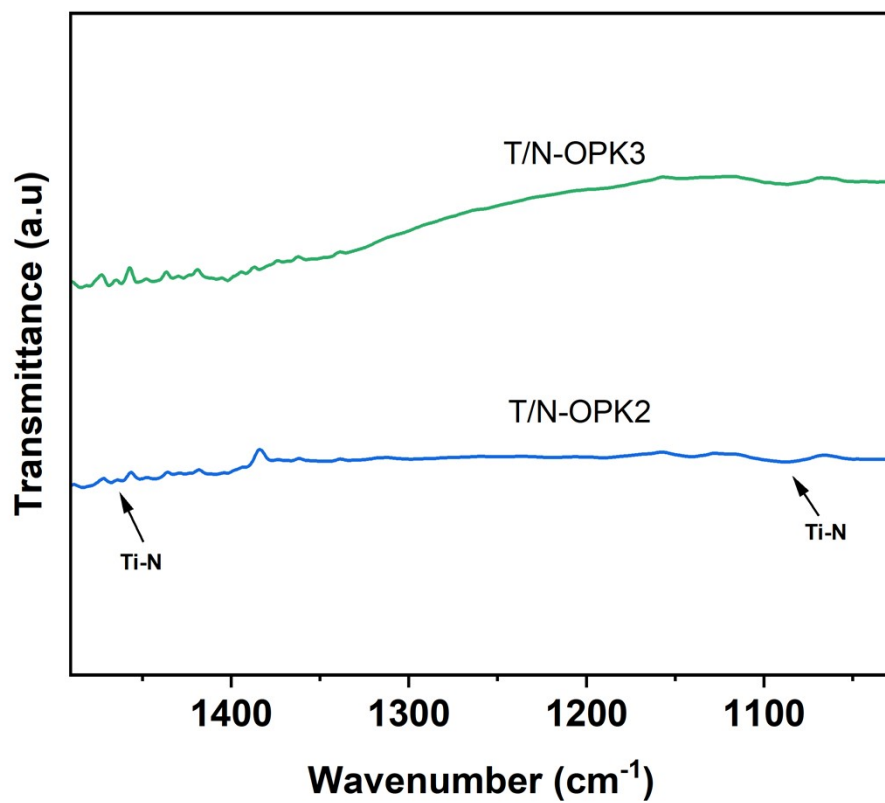

**Figure S1:** Enlarged FT-IR spectra of T/N-OPK2 and T/N-OPK3 in the range of 1490–1050  $cm^{-1}$ .

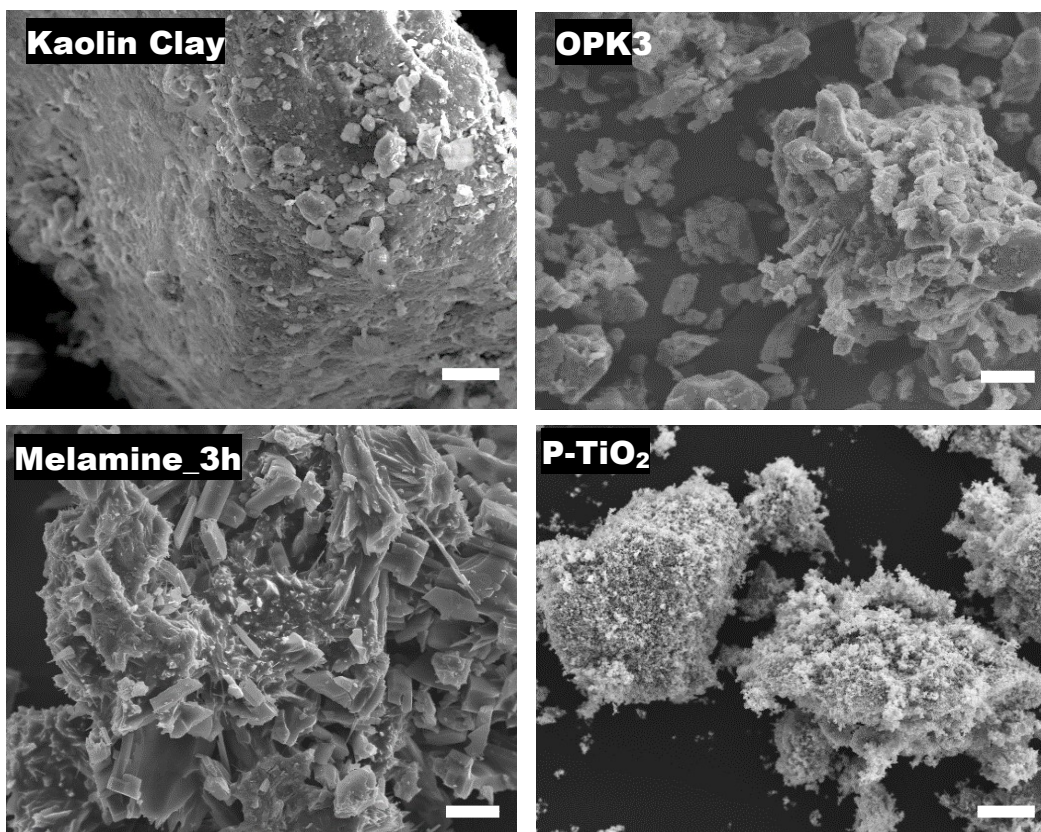

**Figure S2:** SEM images of pristine materials: kaolin clay, OPK3, Melamine\_3h and P-TiO<sub>2</sub>. The scale bar is 20 μm in all images.

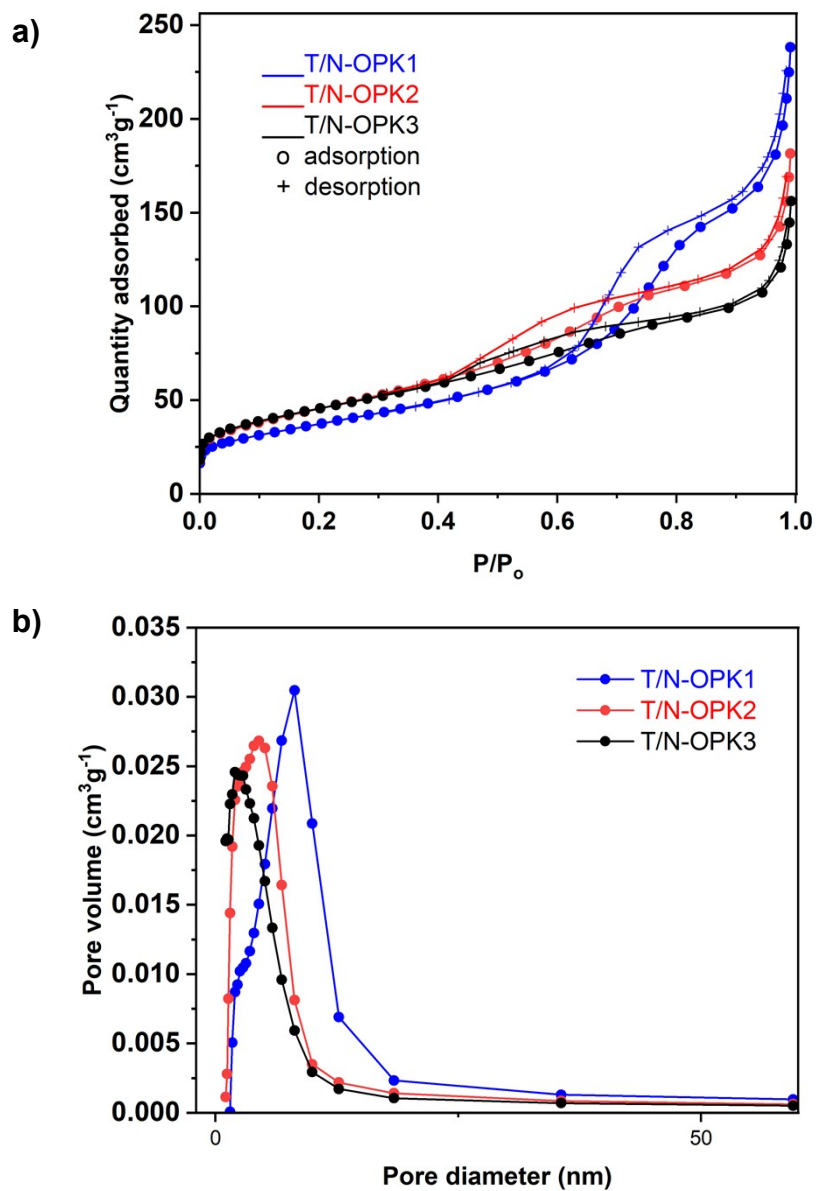

**Figure S3:** a)  $N_2$  adsorption-desorption isotherms b) and corresponding BJH pore-size distributions of the photocatalyst composites.

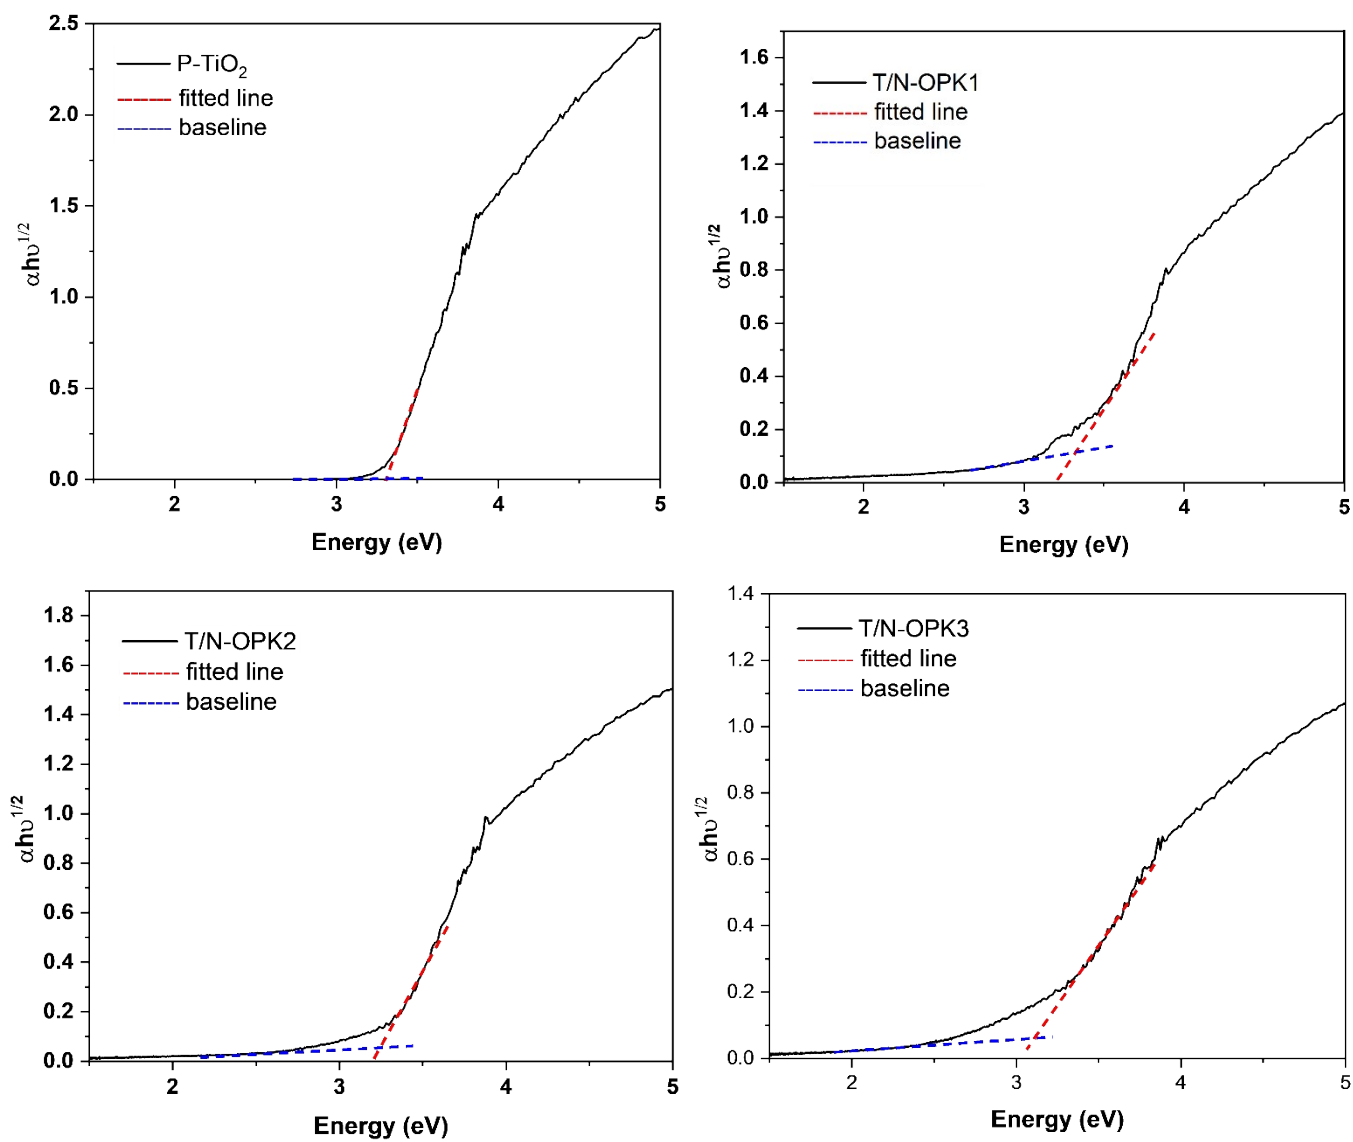

*Figure S4: Tauc plots of the prepared photocatalyst. The determination of the  $E_g$  is shown.*

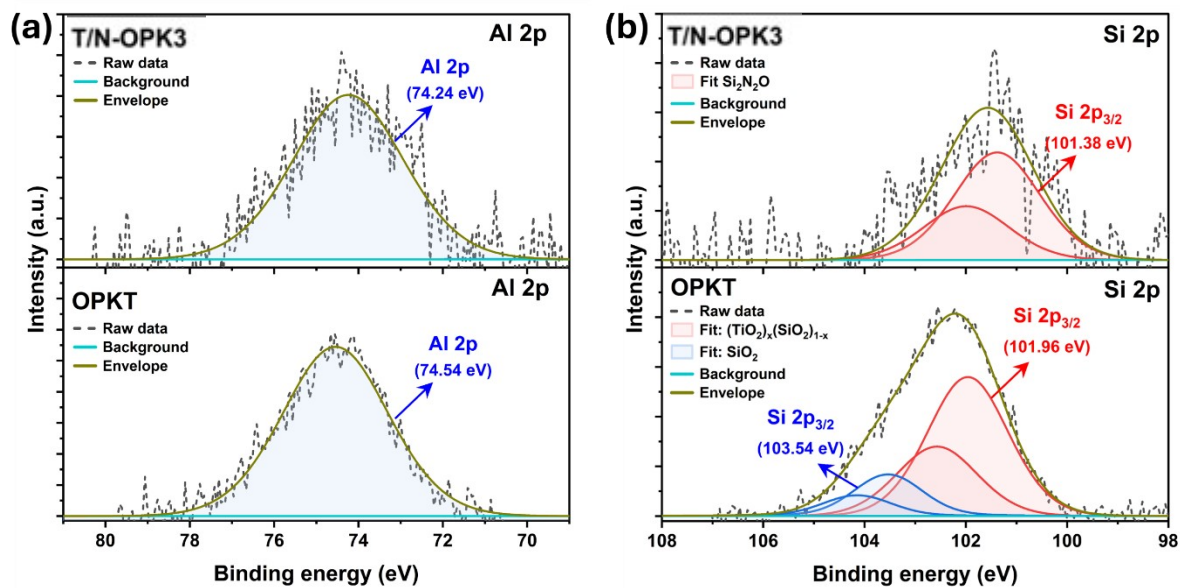

**Figure S5:** High-resolution XPS spectra of Al 2p (a) and Si 2p (b) in T/N-OPK3 and OPKT, respectively.

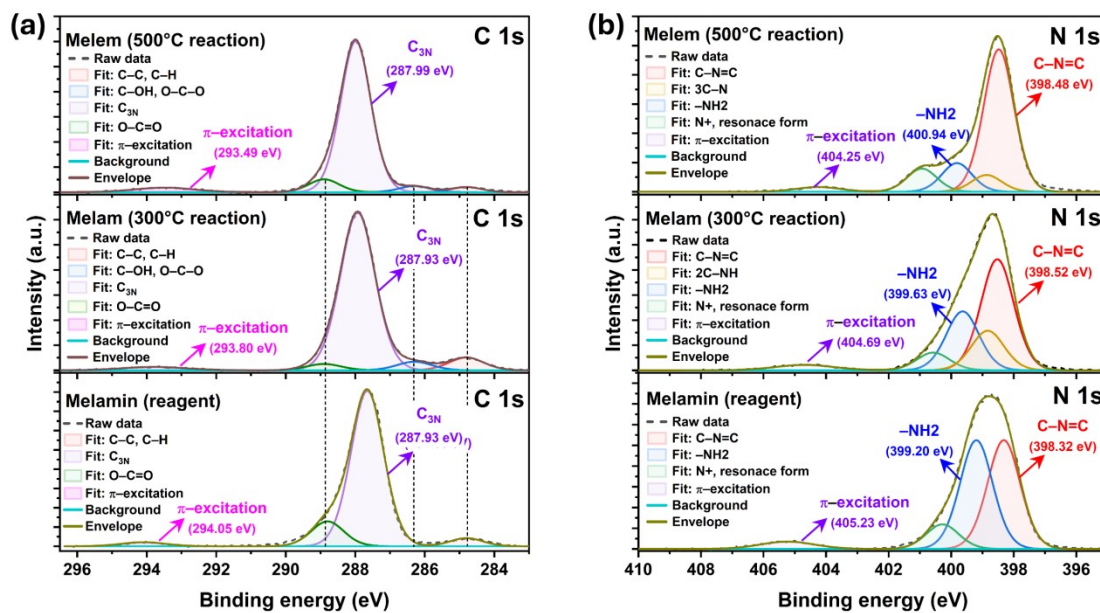

**Figure S6:** High-resolution XPS spectra of C 1s (a) and N 1s (b) in melamine, melam, and melem.

**Scheme S1:** Reaction scheme of melem and melam from melamine by thermal condensation, reproduced from previous literature.<sup>1</sup>

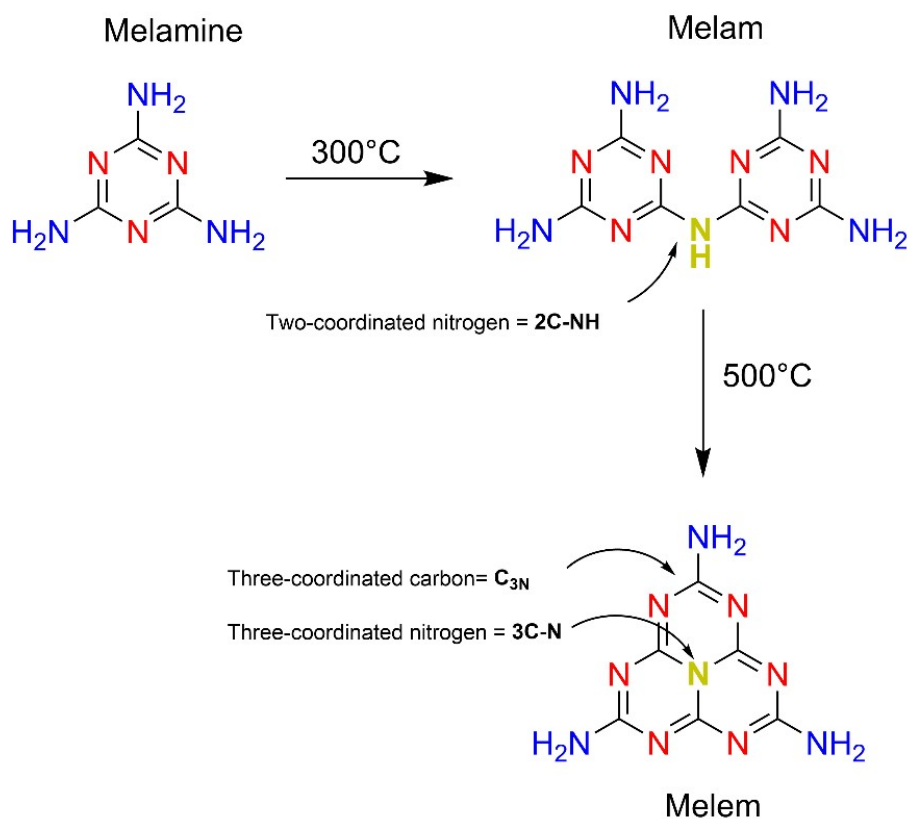

**Table S1.** Quantitative results of XPS measurements

| Sample   | Elemental composition (atomic %)* |       |      |       |      |      | Ratio (%) in Ti 2p                   |                                                       |
|----------|-----------------------------------|-------|------|-------|------|------|--------------------------------------|-------------------------------------------------------|
|          | C                                 | O     | N    | Ti    | Si   | Al   | TiO <sub>2</sub> (Ti <sup>4+</sup> ) | TiO <sub>x</sub> N <sub>1-x</sub> (Ti <sup>3+</sup> ) |
| OPKT     | 11.09                             | 61.58 | 0.4  | 23.75 | 1.82 | 1.36 | 100.0                                | -                                                     |
| T/N-OPK3 | 18.78                             | 50.37 | 8.97 | 19.49 | 0.07 | 2.33 | 70.13                                | 29.87                                                 |

\* = Shirley background were applied for all the survey spectra

**Table S2.** XPS fitting parameters of the C 1s high-resolution spectra

| Sample   | Peak Assignment | Peak Identifier | BE (eV) | Peak Constraint (eV) | FWHM (eV) | FWHM Constraint (eV) | Area (%) | Atomic % | Line shape* |
|----------|-----------------|-----------------|---------|----------------------|-----------|----------------------|----------|----------|-------------|
| OPKT     | Al-C-O          | A               | 283.56  | -                    | 1.6       | B*1                  | 8.01     | 0.89     | GL(30)      |
|          | C-C, C-H        | B               | 284.8   | 284.8                | 1.6       | 0.9-1.6              | 57.25    | 6.35     | GL(30)      |
|          | C-OH            | C               | 286.3   | B+1.5                | 1.6       | B*1                  | 16.55    | 1.84     | GL(30)      |
|          | O-C=O           | D               | 287.8   | B+3                  | 1.6       | B*1                  | 2.85     | 0.32     | GL(30)      |
|          | C=O             | E               | 288.8   | B+4                  | 1.6       | B*1                  | 13.26    | 1.47     | GL(30)      |
|          | K impurity      | F               | 292.98  | -                    | 1.48      | 0.9-1.6              | 2.07     | 0.23     | GL(30)      |
| T/N-OPK3 | Al-C-O          | A               | 283.56  | -                    | 1.6       | B*1                  | 15.43    | 2.90     | GL(30)      |
|          | C-C, C-H        | B               | 284.8   | 284.8                | 1.6       | 0.9-1.6              | 35.15    | 6.60     | GL(30)      |
|          | C-OH            | C               | 286.3   | B+1.5                | 1.6       | B*1                  | 17.6     | 3.31     | GL(30)      |
|          | C <sub>3N</sub> | D               | 287.68  | -                    | 1.6       | B*1                  | 14.96    | 2.81     | GL(30)      |
|          | O-C=O           | E               | 287.8   | B+3                  | 1.6       | B*1                  | 2.15     | 0.40     | GL(30)      |
|          | C=O             | F               | 288.8   | B+4                  | 1.6       | B*1                  | 14.71    | 2.76     | GL(30)      |

\* = Shirley background were applied for all the C 1s high resolution spectra

**Table S3.** XPS fitting parameters of the N 1s high-resolution spectra

| Sample   | Peak Assignment                      | Peak Identifier | BE (eV) | Peak Constraint (eV) | FWHM (eV) | FWHM Constraint (eV) | Area (%) | Atomic % | Line shape* |
|----------|--------------------------------------|-----------------|---------|----------------------|-----------|----------------------|----------|----------|-------------|
| Melamine | C-N=C                                | A               | 398.32  | -                    | 1.23      | 1.0-1.7              | 42.75    | -        | GL(30)      |
|          | -NH <sub>2</sub>                     | B               | 399.2   | -                    | 1.23      | A*1                  | 42.74    | -        | GL(30)      |
|          | N+, resonance                        | C               | 400.28  | -                    | 1.23      | A*1                  | 9.68     | -        | GL(30)      |
|          | pi excitation                        | D               | 405.23  | -                    | 2.06      | 0.7-2.2              | 4.84     | -        | GL(30)      |
| T/N-OPK3 | AlN                                  | A               | 396.08  | -                    | 1.62      | A*1                  | 4.1      | 0.37     | GL(30)      |
|          | TiOxN <sub>1-x</sub>                 | B               | 397.27  | -                    | 1.62      | A*1                  | 16.84    | 1.51     | GL(30)      |
|          | C-N=C                                | C               | 399.53  | -                    | 1.62      | 1.0-1.7              | 33.62    | 3.02     | GL(30)      |
|          | -NH <sub>2</sub> , N <sub>i</sub> -H | D               | 400.73  | -                    | 1.62      | A*1                  | 33.75    | 3.03     | GL(30)      |
|          | Ti-O-N, N+                           | E               | 398.36  | -                    | 1.62      | A*1                  | 11.7     | 1.05     | GL(30)      |

\* = Shirley background were applied for all the N 1s high resolution spectra

**Table S4.** XPS fitting parameters of the Ti 2p high-resolution spectra

| Sample   | Peak Assignment                                        | Peak Identifier | BE (eV) | Peak Constraint (eV) | FWHM (eV) | FWHM Constraint (eV) | Area (%) | Area Constraint | Atomic % | Line shape* |
|----------|--------------------------------------------------------|-----------------|---------|----------------------|-----------|----------------------|----------|-----------------|----------|-------------|
| OPKT     | TiO <sub>2</sub> (2p <sub>3/2</sub> )                  | A               | 458.59  | A                    | 1.2       | 0.9-1.2              | 66.69    | A               | 15.84    | GL(30)      |
|          | TiO <sub>2</sub> (2p <sub>1/2</sub> )                  | B               | 464.31  | A+5.72               | 2.13      | 1.9-2.2              | 33.31    | A*0.5           | 7.91     | GL(30)      |
| T/N-OPK3 | TiO <sub>x</sub> N <sub>1-x</sub> (2p <sub>3/2</sub> ) | A               | 457.35  | A                    | 1.2       | C*1                  | 19.92    | A               | 3.88     | GL(30)      |
|          | TiO <sub>x</sub> N <sub>1-x</sub> (2p <sub>1/2</sub> ) | B               | 463.07  | A+5.72               | 2.15      | D*1                  | 9.95     | A*0.5           | 1.94     | GL(30)      |
|          | TiO <sub>2</sub> (2p <sub>3/2</sub> )                  | C               | 458.25  | C                    | 1.2       | 0.9-1.2              | 46.77    | C               | 9.12     | GL(30)      |
|          | TiO <sub>2</sub> (2p <sub>1/2</sub> )                  | D               | 463.97  | C+5.72               | 2.15      | 1.9-2.2              | 23.36    | C*0.5           | 4.55     | GL(30)      |

\* = Shirley background were applied for all the Ti 2p high resolution spectra

**Table S5:** The kinetic parameter vs. catalyst for the degradation of BPA and TET

| Contaminants       | BPA                     |                          |                   |                    | TET     |                          |                                                     |                    |
|--------------------|-------------------------|--------------------------|-------------------|--------------------|---------|--------------------------|-----------------------------------------------------|--------------------|
|                    | Parameter/<br>Material  | $k$ (min <sup>-1</sup> ) | Normalized<br>$k$ | $t_{1/2}$<br>(min) | $R^2$   | $k$ (min <sup>-1</sup> ) | Normalized<br>$k$ min <sup>-1</sup> g <sup>-1</sup> | $t_{1/2}$<br>(min) |
| T/N-OPK1           | 0.00596 ±               | 0.119 ± 5.62             | 116.275           | 0.985              | 0.481 ± | 9.62 ±                   | 1.441                                               | 0.99               |
|                    | 2.81 x 10 <sup>-4</sup> | x 10 <sup>-3</sup>       |                   |                    | 0.00154 | 0.0308                   |                                                     | 9                  |
| T/N-OPK2           | 0.0110 ±                | 0.20 ± 9.56              | 63.115            | 0.987              | 0.491 ± | 9.82 ± 3.00              | 1.411                                               | 0.82               |
|                    | 4.78 x 10 <sup>-4</sup> | x 10 <sup>-3</sup>       |                   |                    | 0.150   |                          |                                                     | 8                  |
| T/N-OPK3           | 0.0128 ±                | 0.256 ±                  | 54.310            | 0.985              | 0.274 ± | 5.48 ±                   | 2.567                                               | 1                  |
|                    | 7.17 x 10 <sup>-4</sup> | 1.43 x 10 <sup>-2</sup>  |                   |                    | 0.00031 | 0.00632                  |                                                     | 6                  |
| OPKT               | 0.000160±               | 0.00320 ±                | 4337.40           | -                  | 0.187 ± | 3.74 ±                   | 3.707                                               | -                  |
|                    | 7.51 x 10 <sup>-4</sup> | 1.50 x 10 <sup>-2</sup>  | 4                 |                    | 0.0109  | 0.218                    |                                                     |                    |
| P-TiO <sub>2</sub> | 0.00025355              | 0.0051 ±                 | 2733.11           | -                  | 0.0819  | 1.64 ±                   | 8.461                                               | -                  |
|                    | 7 ± 2.04 x              | 4.08 x 10 <sup>-3</sup>  | 3                 |                    | ±       | 0.282                    | 538                                                 |                    |

|  |                  |  |  |  |        |  |  |  |
|--|------------------|--|--|--|--------|--|--|--|
|  | 10 <sup>-4</sup> |  |  |  | 0.0141 |  |  |  |
|--|------------------|--|--|--|--------|--|--|--|

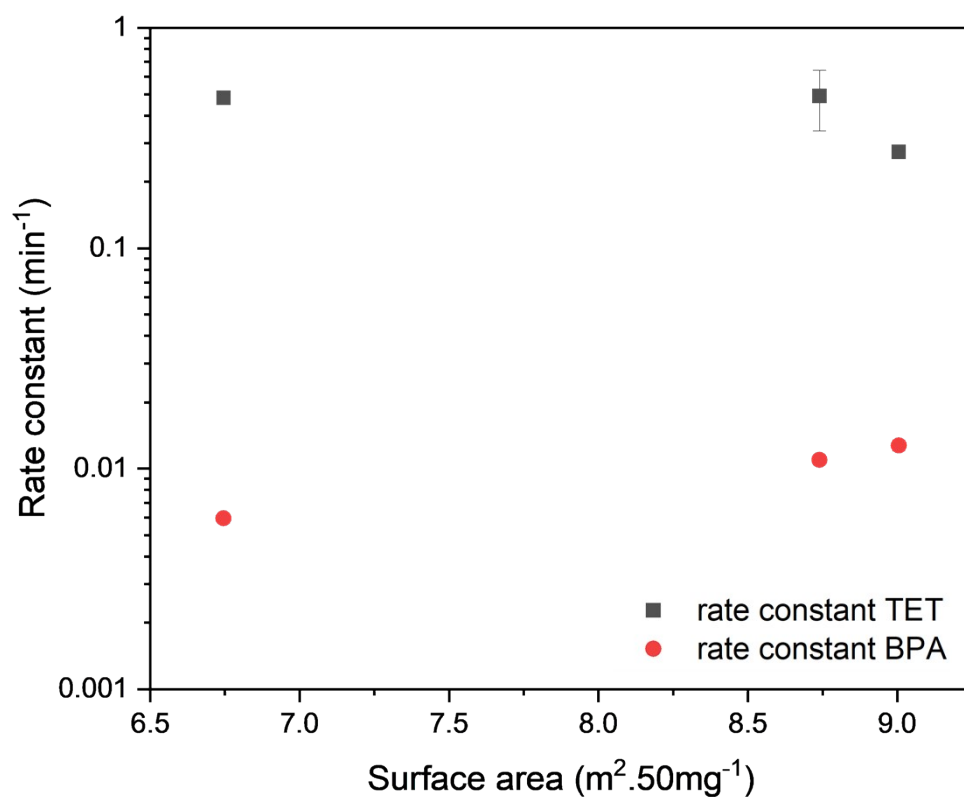

**Figure S7:** Direct correlation between surface area of the photocatalysts and rate constant,  $k$ .

**Table S6:** Equilibrium adsorption capacities ( $q_e$ ) of BPA and TET on T/N-OPK catalysts under dark conditions

| Catalyst | BPA ( $q_e$ , mg.g <sup>-1</sup> ) | TET ( $q_e$ , mg.g <sup>-1</sup> ) |
|----------|------------------------------------|------------------------------------|
| T/N-OPK1 | 0.150                              | 0.834                              |
| T/N-OPK2 | 0.122                              | 0.801                              |
| T/N-OPK3 | 0.074                              | 0.735                              |

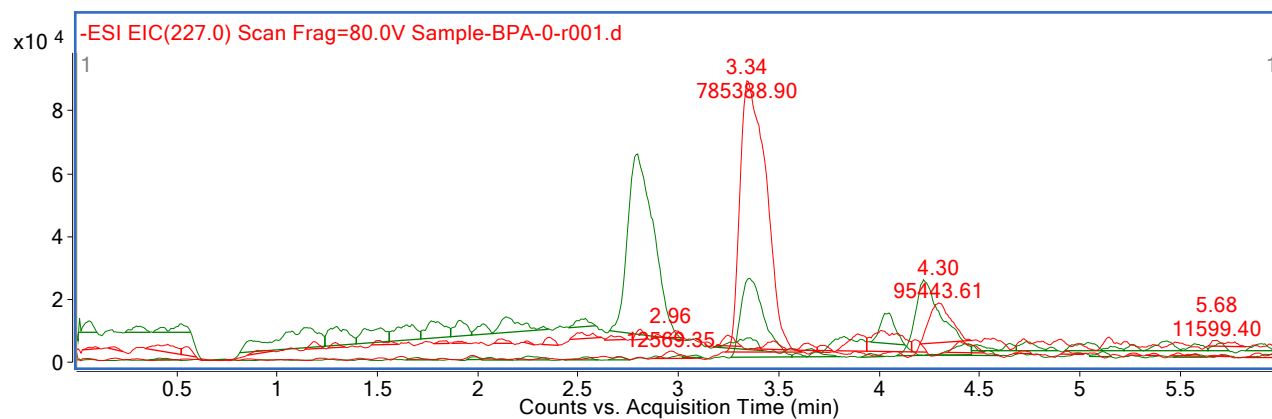

**Figure S8:** The extracted ion chromatogram of the LC-MS of the BPA solution before (red) and after (green) degradation using T/N-OPK3. The major mass is  $m/z$  257 (breakdown products), as indicated in the following mass spectra in Figure S4 at the corresponding retention time.

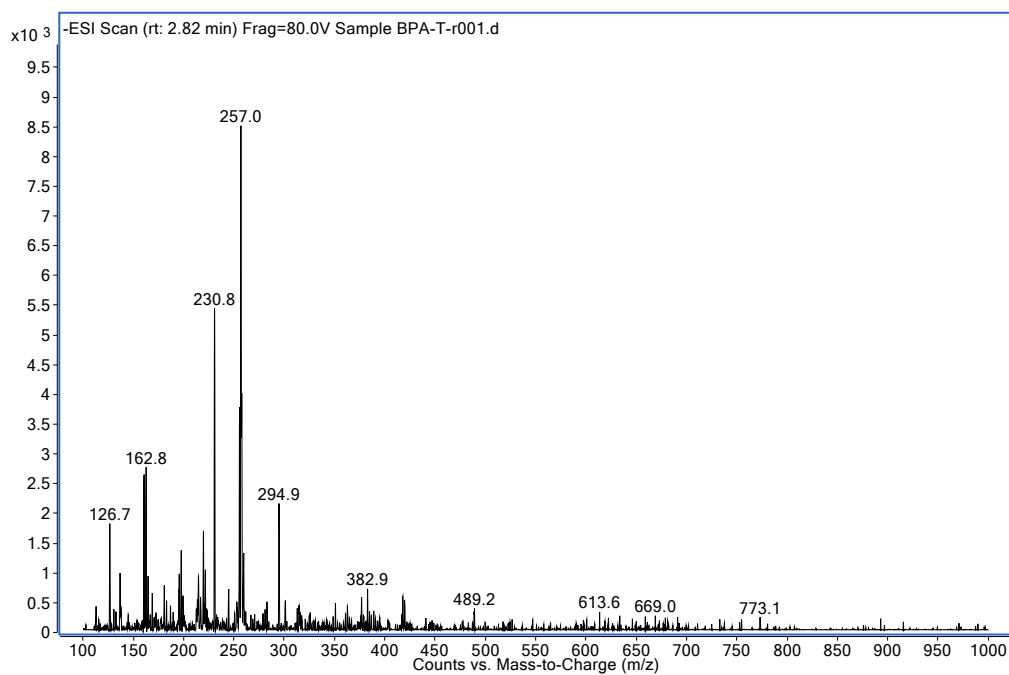

**Figure S9:** The extracted ion chromatogram of LC-MS of the intermediate product after degradation of 10 mg/L BPA solution using T/N-OPK3 at retention time 2.82 min.

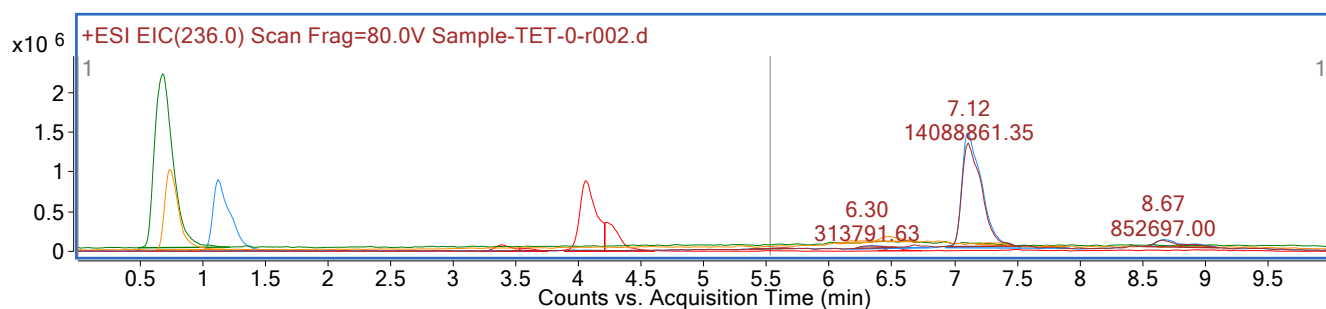

**Figure S10:** The extracted ion chromatogram of the LC-MS of the TET solution before (red) and after (other colors) degradation using T/N-OPK3. The major masses are  $m/z$  127,169,236 (breakdown products) and 445.1 (control TET), as indicated in the following mass spectra in Figure S6-S7 at the corresponding retention times.

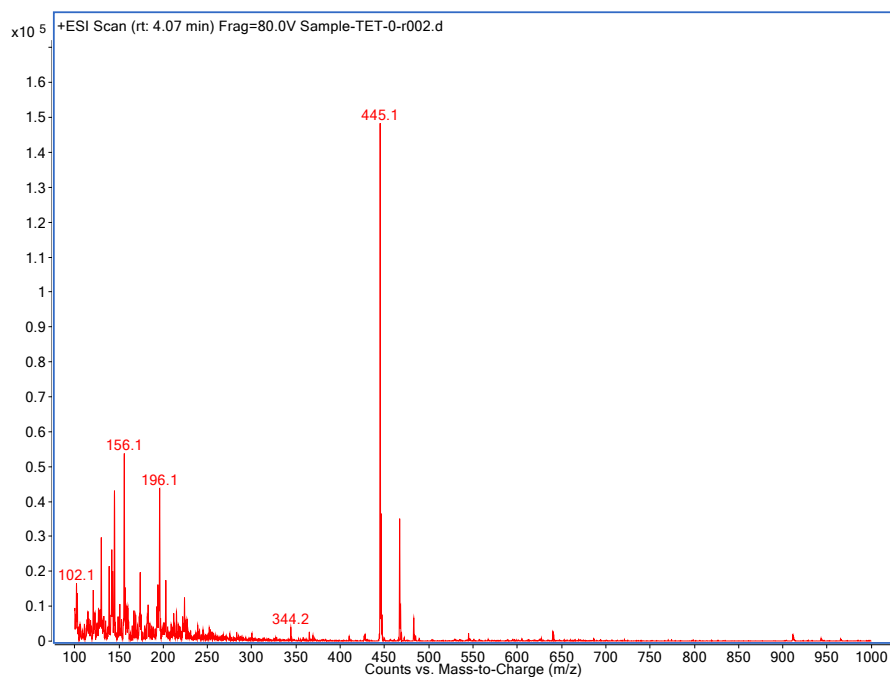

**Figure S11:** The extracted ion chromatogram of LC-MS of the control TET at retention time 4.07 min.

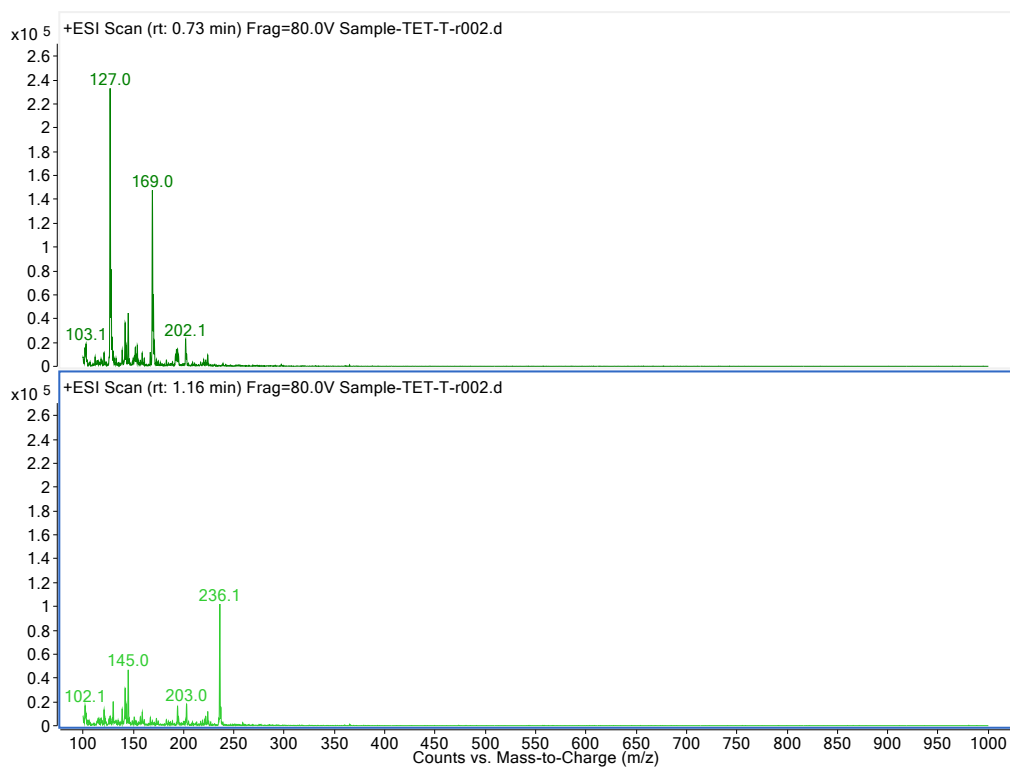

**Figure S12:** The extracted ion chromatogram of LC-MS of the intermediate product (a) and (b) at retention time 0.73 and 1.16 min, respectively.

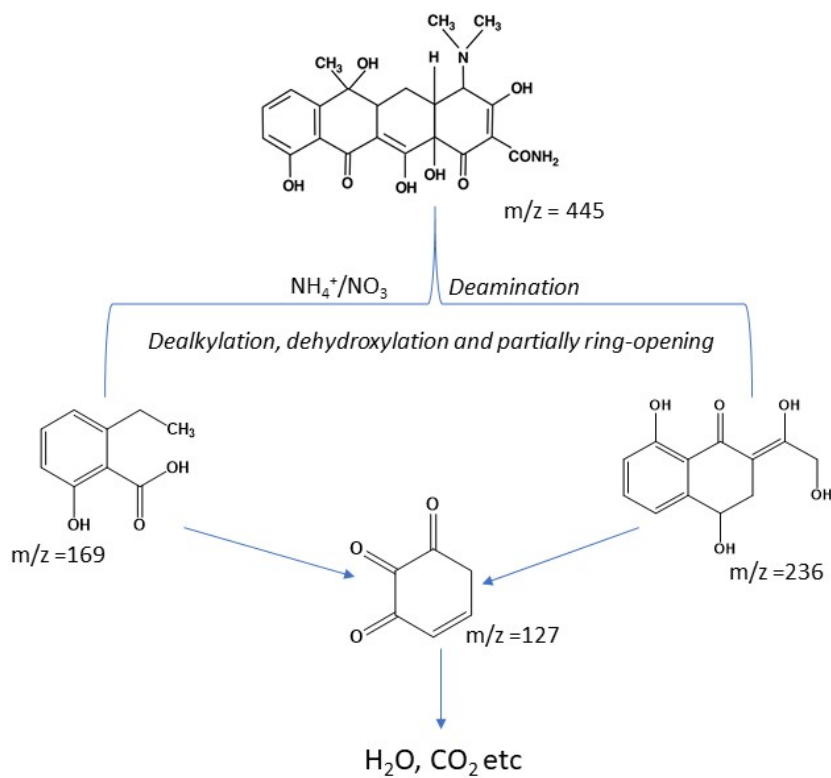

**Figure S13:** Proposed TET degradation pathway

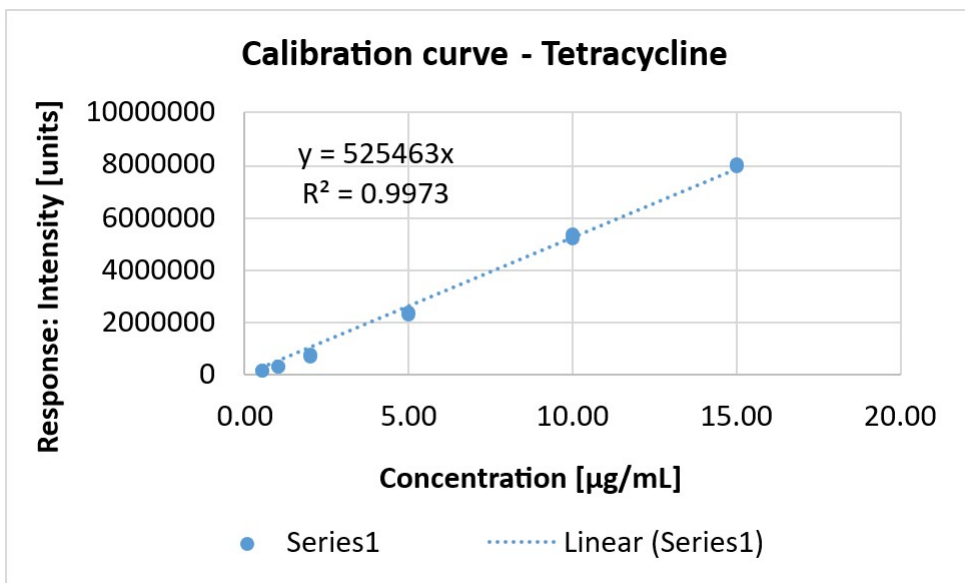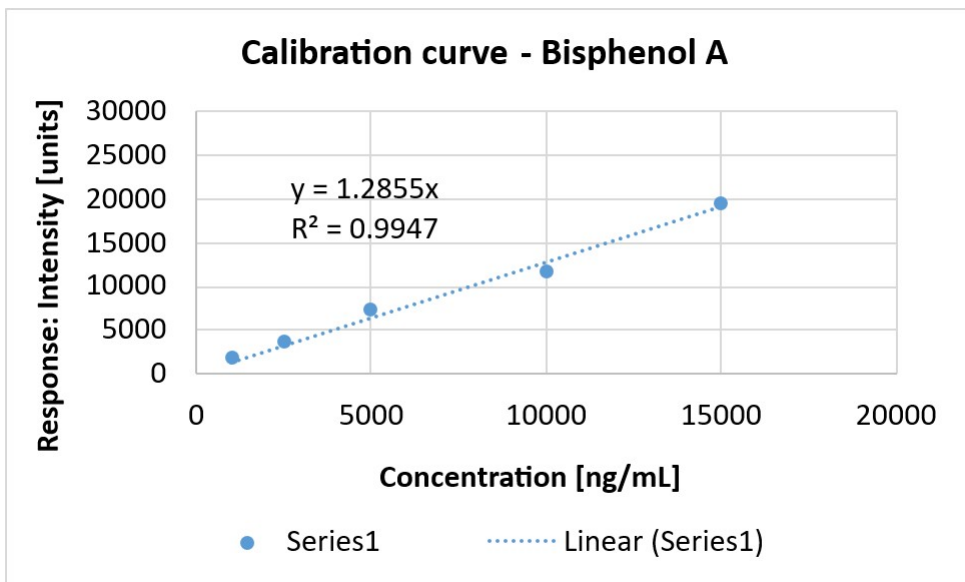

**Figure S14:** Calibration curve employed for Tetracycline (Calibration range is 0.5  $\mu\text{g/mL}$  - 15  $\mu\text{g/mL}$ , LOD = 0.022  $\mu\text{g/mL}$ ) and Bisphenol A (Calibration range is 0.5  $\mu\text{g/mL}$  - 15  $\mu\text{g/mL}$ , LOD = 0.043  $\mu\text{g/mL}$ )

**Table S7:** The physicochemical properties of the various water matrices.

| SAMPLES         | pH  | (TOC) ( $\text{mg.L}^{-1}$ ) | Temp ( $^{\circ}\text{C}$ ) |
|-----------------|-----|------------------------------|-----------------------------|
| Deionized water | 7.0 | $8.116 \pm 0.095$            | 25                          |
| Tap water       | 7.2 | $20.914 \pm 0.34$            | 25                          |
| River water     | 7.0 | $20.225 \pm 0.37$            | 25                          |

\*Typical TOC value in drinking water may range from 0.1 to 25  $\text{mg.L}^{-1}$  depending on regulatory compliance, matrix, quality and territory<sup>2</sup>

**Table S8:** Comparison of *T/N-OPK3* with Other  $\text{TiO}_2$  Photocatalyst Composites

| Photocatalyst                                                          | Contaminant                | Reaction Condition                                                                         | Surface area ( $\text{m}^2.\text{g}$ ) | Degradation efficiency (%) | TOC removal (%) | Reference     |
|------------------------------------------------------------------------|----------------------------|--------------------------------------------------------------------------------------------|----------------------------------------|----------------------------|-----------------|---------------|
| N-doped MCMs@ $\text{TiO}_2$                                           | Tetracycline               | I.C = 80 $\text{mg}.\text{L}^{-1}$ , I.T= 120 min, dosage= 50 mg                           | 370                                    | 74.4                       | 57              | <sup>3</sup>  |
| N-doped $\text{TiO}_2$ @C                                              | Tetracycline hydrochloride | I.C = 15 $\text{mg}.\text{L}^{-1}$ , I.T= 90 min, mass= 20 mg,                             | 63                                     | 93                         | -               | <sup>4</sup>  |
| N-Doped Carbon Quantum Dots-Decorated $\text{TiO}_2$                   | Tetracycline               | I.C = 10 $\text{mg}.\text{L}^{-1}$ , dosage= 20 mg, , I.T= 120 min,                        | 161.1                                  | 97.7                       | -               | <sup>5</sup>  |
| <b>N-<math>\text{TiO}_2</math>/g-<math>\text{C}_3\text{N}_4</math></b> | Bisphenol A                | I.C = 10 $\text{mg}.\text{L}^{-1}$ , I.T= 240min, dosage = 0.5 $\text{g}.\text{L}^{-1}$    | 47.2                                   | 95.5                       | -               | <sup>6</sup>  |
| <b>g-<math>\text{C}_3\text{N}_4</math>/<math>\text{TiO}_2</math></b>   | Bisphenol A                | I.C = 10 $\text{mg}.\text{L}^{-1}$ , dosage=31.25 mg, I.T= 120 min                         | 53                                     | 30.3                       | 25.4            | <sup>7</sup>  |
| <b>N-doped <math>\text{TiO}_2</math>-<math>\text{SiO}_2</math></b>     | Bisphenol A                | I.C = 10 $\text{mg}.\text{L}^{-1}$ , dosage= I.T= 240 min                                  | 157                                    | 90.7                       | -               | <sup>8</sup>  |
| <b>Cu-N/<math>\text{TiO}_2</math></b>                                  | Bisphenol A                | I.C = 10 $\text{mg}.\text{L}^{-1}$ , dosage= 0.5 $\text{g}.\text{L}^{-1}$ , I.T= 120 min   | -                                      | 42.7                       | -               | <sup>9</sup>  |
| <b><math>\text{TiO}_2</math>/rice husk</b>                             | Bisphenol A                | I.C = 10 $\text{mg}.\text{L}^{-1}$ , dosage= 0.5 $\text{g}.\text{L}^{-1}$ , I.T= 60 min, , | 821                                    | 97.6                       | -               | <sup>10</sup> |
| <b>N-doped <math>\text{TiO}_2</math>/AC composite</b>                  | Bisphenol A                | I.C = 36 $\text{mg}.\text{L}^{-1}$ dosage= 0.25 $\text{g}.\text{L}^{-1}$ I.T= 180 min      | 559                                    | 59                         | -               | <sup>11</sup> |
| <b>C600KT</b>                                                          | Tetracycline               | I.C = 20 $\text{mg}.\text{L}^{-1}$ , dosage= 0.05g, I.T= 120 min                           | 70.9                                   | 89                         | 50              | <sup>12</sup> |
| <b>T/N-OPK3</b>                                                        | Tetracycline               | I.C = 10 $\text{mg}.\text{L}^{-1}$ , dosage= 0.05g, I.T= 30 min                            | 180                                    | 100                        | 46              | This study    |
| <b>T/N-OPK3</b>                                                        | Bisphenol A                | I.C = 10 $\text{mg}.\text{L}^{-1}$                                                         | 180                                    | 82                         | 50              | This study    |

|  |  |                                     |  |  |  |  |
|--|--|-------------------------------------|--|--|--|--|
|  |  | , dosage=<br>0.05g, I.T=<br>120 min |  |  |  |  |
|--|--|-------------------------------------|--|--|--|--|

## References

1. N. Liu, T. Li, Z. Zhao, J. Liu, X. Luo, X. Yuan, K. Luo, J. He, D. Yu and Y. Zhao, *ACS omega*, 2020, **5**, 12557-12567.
2. G. Visco, L. Campanella and V. Nobili, *Microchem. J.*, 2005, **79**, 185-191.
3. Y. Zhou, T. Cai, S. Liu, Y. Liu, H. Chen, Z. Li, J. Du, Z. Lei and H. Peng, *Chem. Eng. J.*, 2021, **411**, 128615.
4. W. Wang, W. Qiang, C. Chen and D. Sun, *Polymers*, 2024, **16**, 186.
5. M. Karaca, Z. Eroglu, O. z. Açışlı, O. Metin and S. Karaca, *ACS omega*, 2023, **8**, 26597-26609.
6. M. H. Hazaraimi, P. S. Goh, L. Y. Wang, W. J. Lau, M. N. Subramaniam, A. F. Ismail, N. Hashim, N. D. Kerisnan, N. K. E. Yahaya and R. B. R. Mamat, *Arabian Journal for Science and Engineering*, 2025, **50**, 4367-4381.
7. M. Roškarič, G. Žerjav, J. Zavašnik, M. Finšgar and A. Pintar, *Molecules*, 2025, **30**, 460.
8. M. V. Lê, *Malaysian NANO-An International Journal*, 2022, **2**, 1-14.
9. S. Krishnan, A. V. Karim and A. Shriwastav, *Water Science & Technology*, 2022, **86**, 1527-1539.
10. D. Van Thuan, T. T. H. Chu, H. D. T. Thanh, M. V. Le, H. L. Ngo, C. L. Le and H. P. Thi, *Environ. Res.*, 2023, **236**, 116789.
11. P.-S. Yap, T.-T. Lim, M. Lim and M. Srinivasan, *Catal. Today*, 2010, **151**, 8-13.
12. M. O. Adesina, M. O. Alfred, H. Seitz, K. Brennenstuhl, H. M. Rawel, P. Wessig, J. Kim, A. Wedel, W. Koopman and C. Günter, *Environmental Science: Water Research & Technology*, 2024, **10**, 1432-1450.
